# Supplementary material for: Ecosystem-scale greenhouse gas fluxes from actively extracted peatlands: water table depth drives interannual variability
Source: Copernicus journal article supplement (doi:10.5194/bg-23-793-2026), 2026-01-26
Supplement: Supplementary file 1 [file bg-23-793-2026-supplement.pdf]

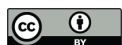

*Supplement of*

## **Ecosystem-scale greenhouse gas fluxes from actively extracted peatlands: water table depth drives interannual variability**

**Miranda L. Hunter et al.**

*Correspondence to:* Miranda L. Hunter ([mlhunter@uwaterloo.ca](mailto:mlhunter@uwaterloo.ca))

The copyright of individual parts of the supplement might differ from the article licence.

## **S1** Methods for assessing the effect of extraction activities on CO<sub>2</sub> emissions.

The trail camera was oriented westward and programmed to take a photo when it detected motion in front of it, with a detection range of ~ two peat fields. The photos were visually inspected to confirm the presence of extraction activity. Vacuum harvesting and harrowing activities were distinguished by the unique equipment required for each. To account for the unknown activity on the eastern half of the site, we added thirty minutes before and after the observed extraction activity time window. This was based on personal observations of extraction activity.

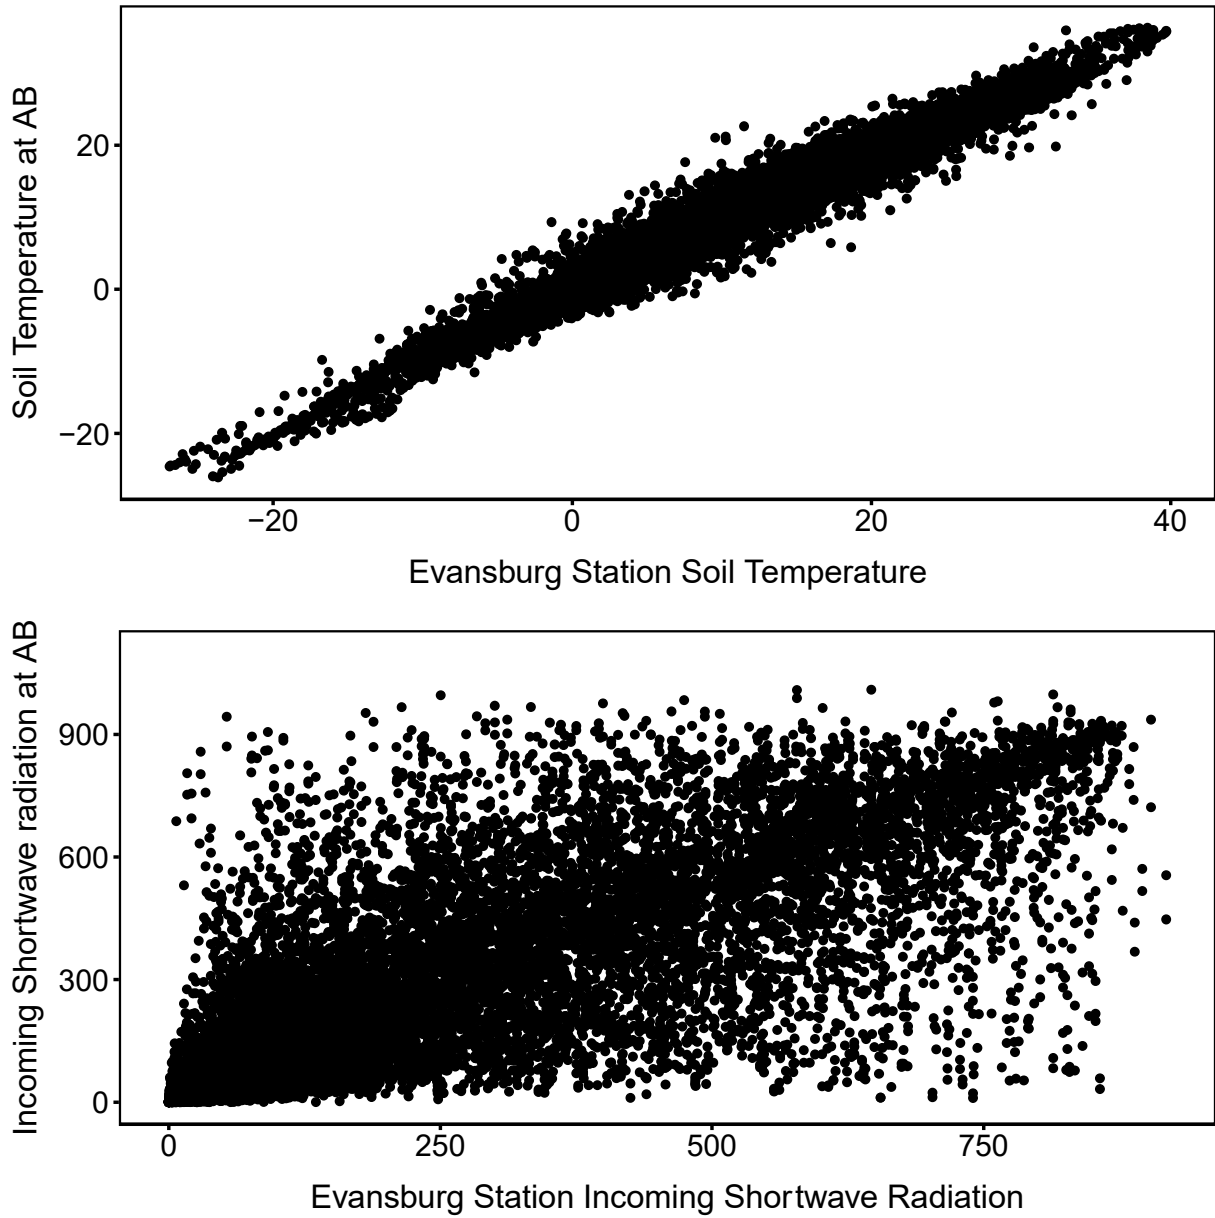

**Figure S1** Scatter plot of the average half-hourly air temperature in °C (bottom) and half-hourly incoming shortwave radiation in  $\text{W m}^{-2}$  (top) obtained from Evansburg 2 ADGM weather station (ACIS, 2023) versus the measured values at AB. The linear regressions were significant for solar radiation ( $F_{1,38451}=103305$ ,  $p<0.0001$ ;  $R^2=0.71$ ) and air temperature ( $F_{1,14421}=403386$ ,  $p<0.0001$ ;  $R^2=0.96$ ).

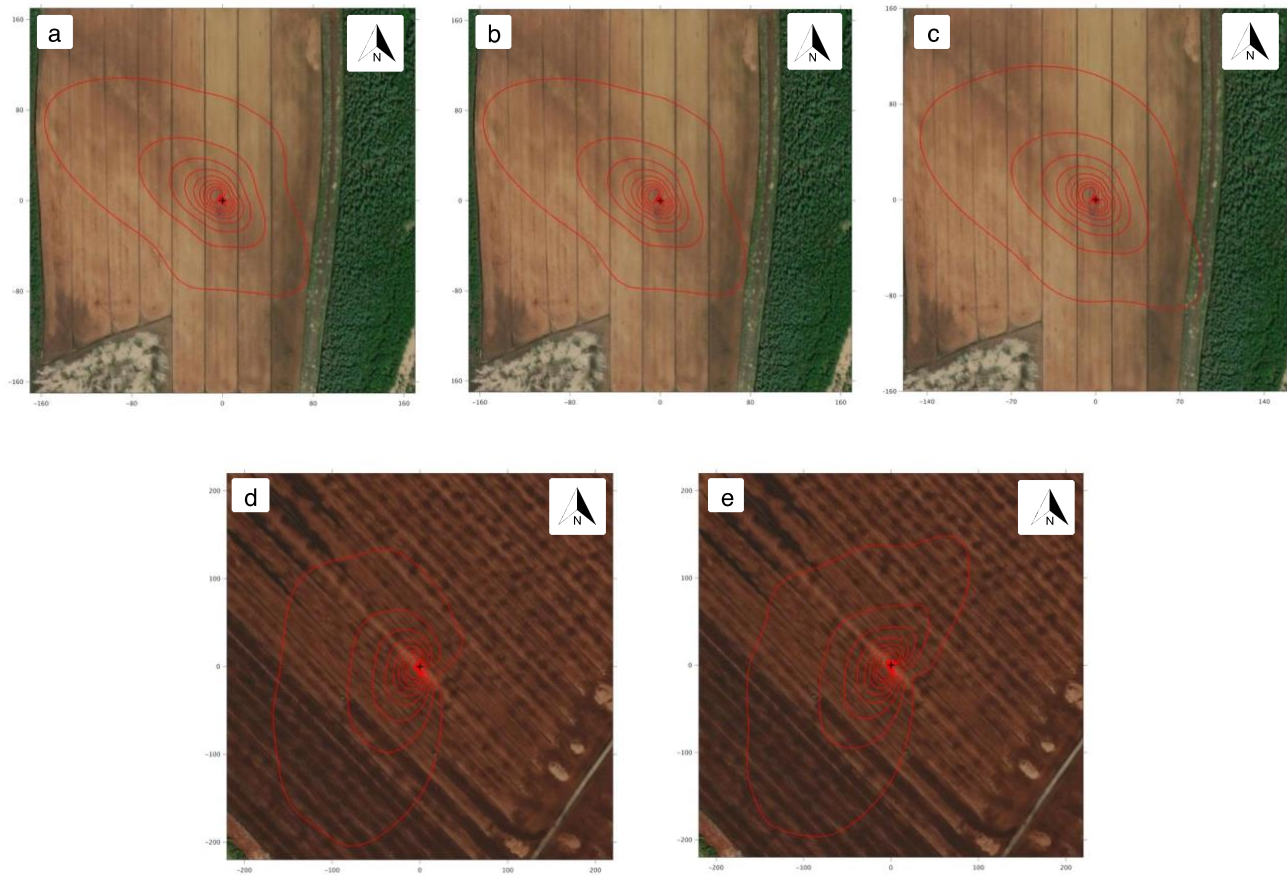

**Figure S2** 2D flux footprint probability contour maps of CO<sub>2</sub> at the AB site in 2020, (a) 2021 (b) and 2022 (c), and at the QC site in 2020 (d) and 2022 (e). The plots were created using the online tool by Kljun et al., (2015). The scale bars along the x and y axes are in meters. The outermost contour line represents the 90<sup>th</sup> percentile probability.

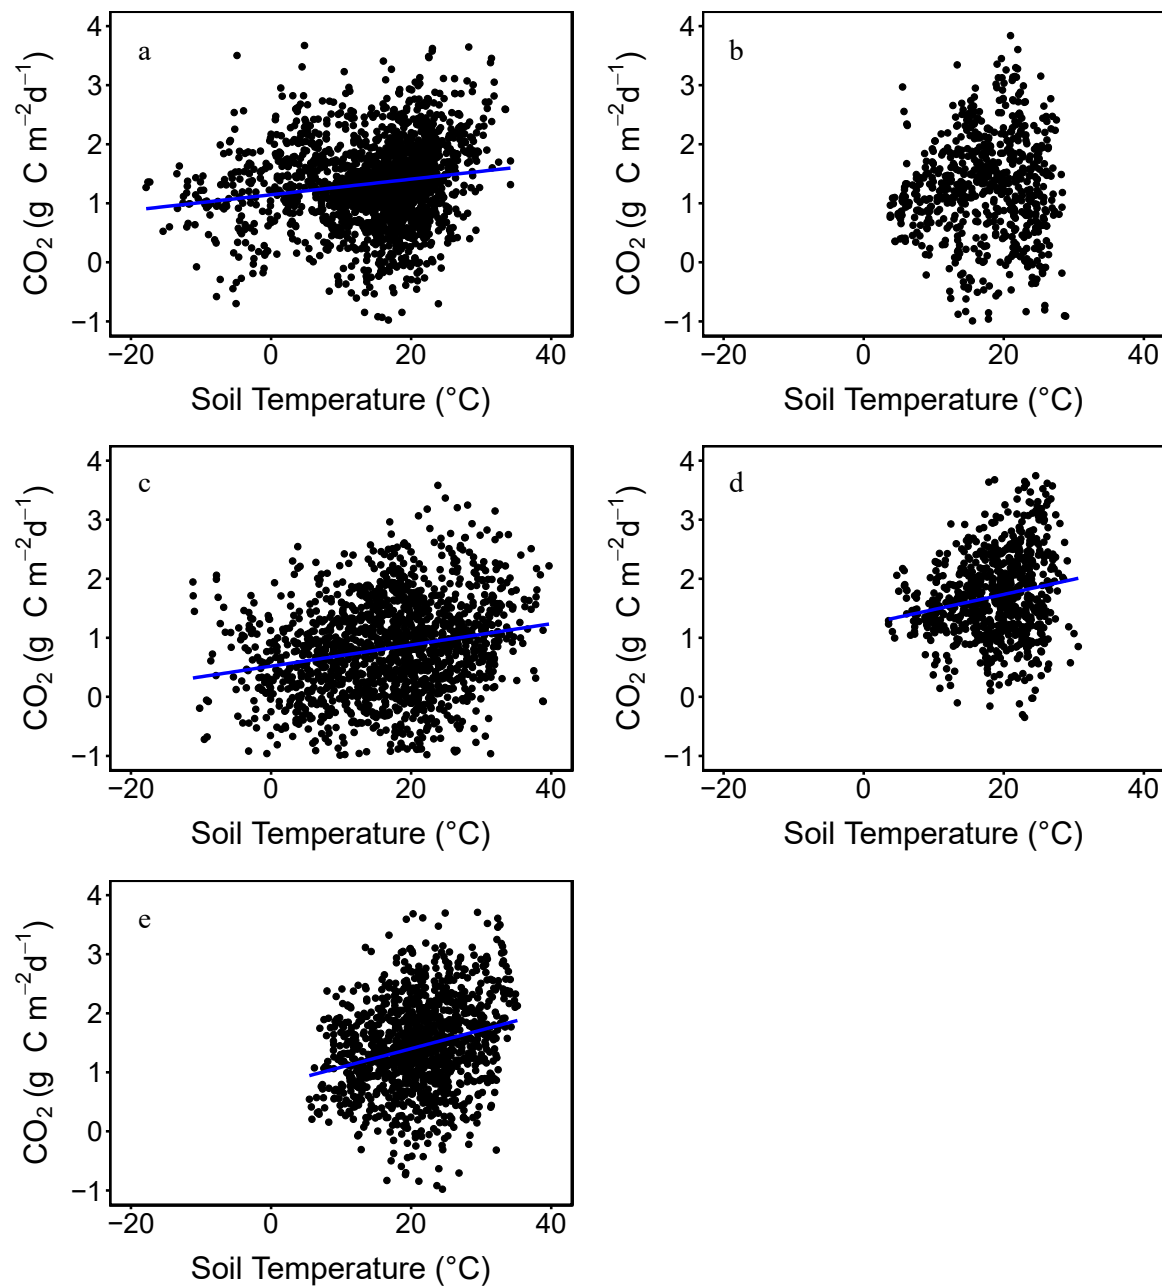

**Figure S3** Scatterplots showing the effect of half-hourly air temperature on CO<sub>2</sub> emissions in 2020 (a), 2021 (c) and 2022 (e) at AB, and in 2020 (b) and 2022 (d) at QC. Best fit lines were shown when linear regressions were significant. The explanatory power was 2.5%, 4.3% and 6.3% at AB in 2020, 2021 and 2022 respectively, and 3.5% at QC in 2022.

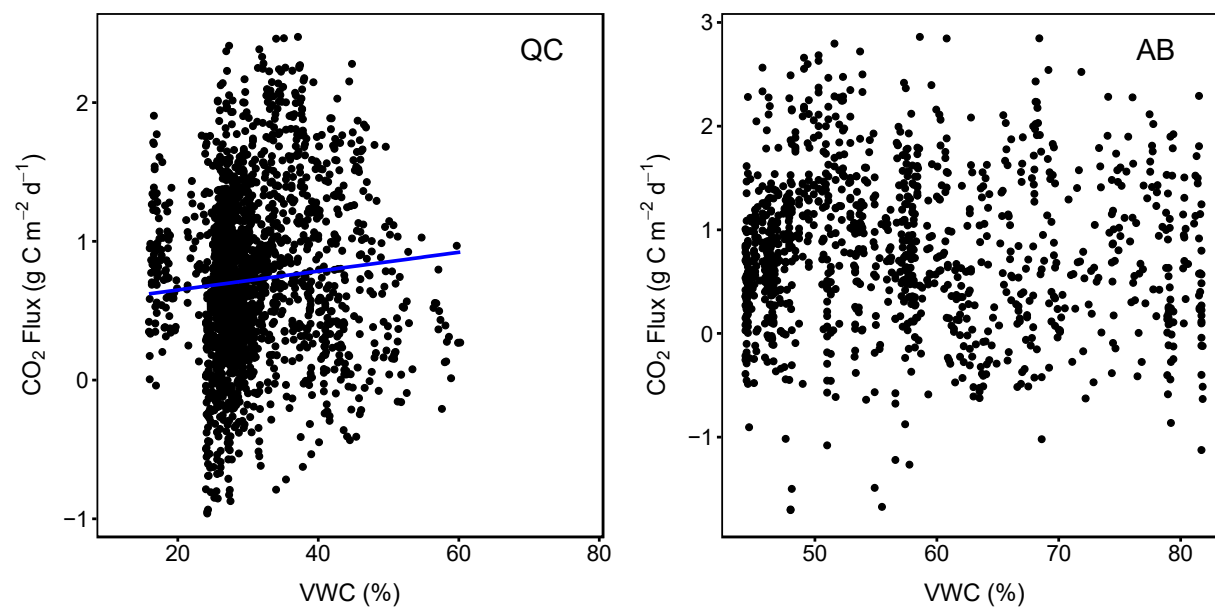

**Figure S4** Scatterplots showing the effect of half-hourly volumetric water content (VWC) on CO<sub>2</sub> fluxes at AB and QC. At QC, VWC explained less than 1% of the variation in CO<sub>2</sub> fluxes ( $F_{1,2177}=14.89$ ,  $p=0.0001$ ).

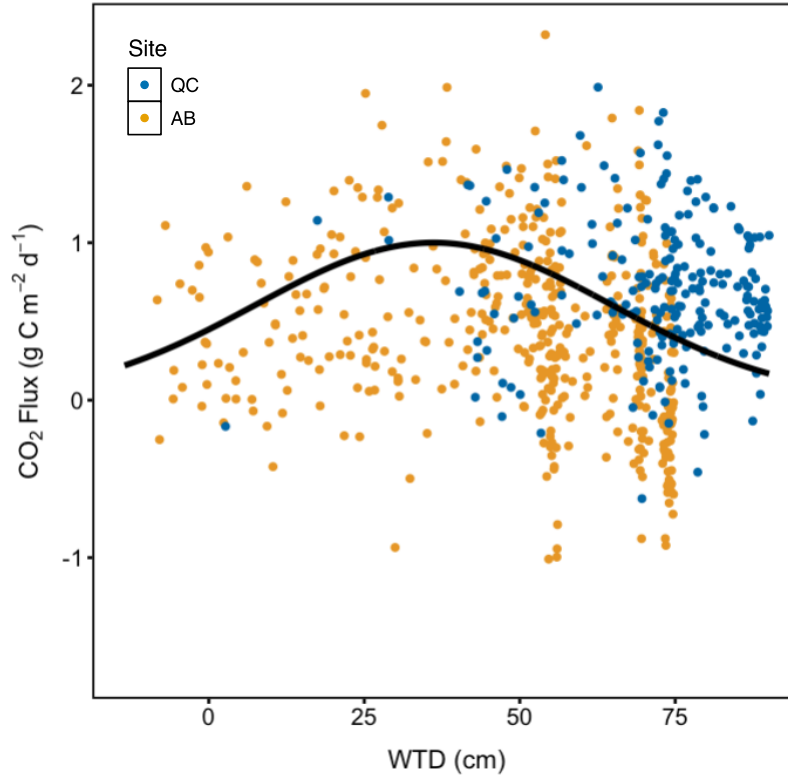

Figure S5 Scatterplot showing the effect of WTD (cm) on daily average CO<sub>2</sub> fluxes (g C m<sup>-2</sup> d<sup>-1</sup>) at AB and QC. The data has been fit with a Gaussian relationship (Equation 1 in main text), with fitted WTD<sub>opt</sub> and WTD<sub>tol</sub> parameters of  $33.1 \pm 2.8$  and  $27.8 \pm 2.3$  respectively. We observed 95% confidence intervals of 27.4-38.4 and 23.9-32.5 for the two fitted parameters through a non-parametric bootstrap analysis.

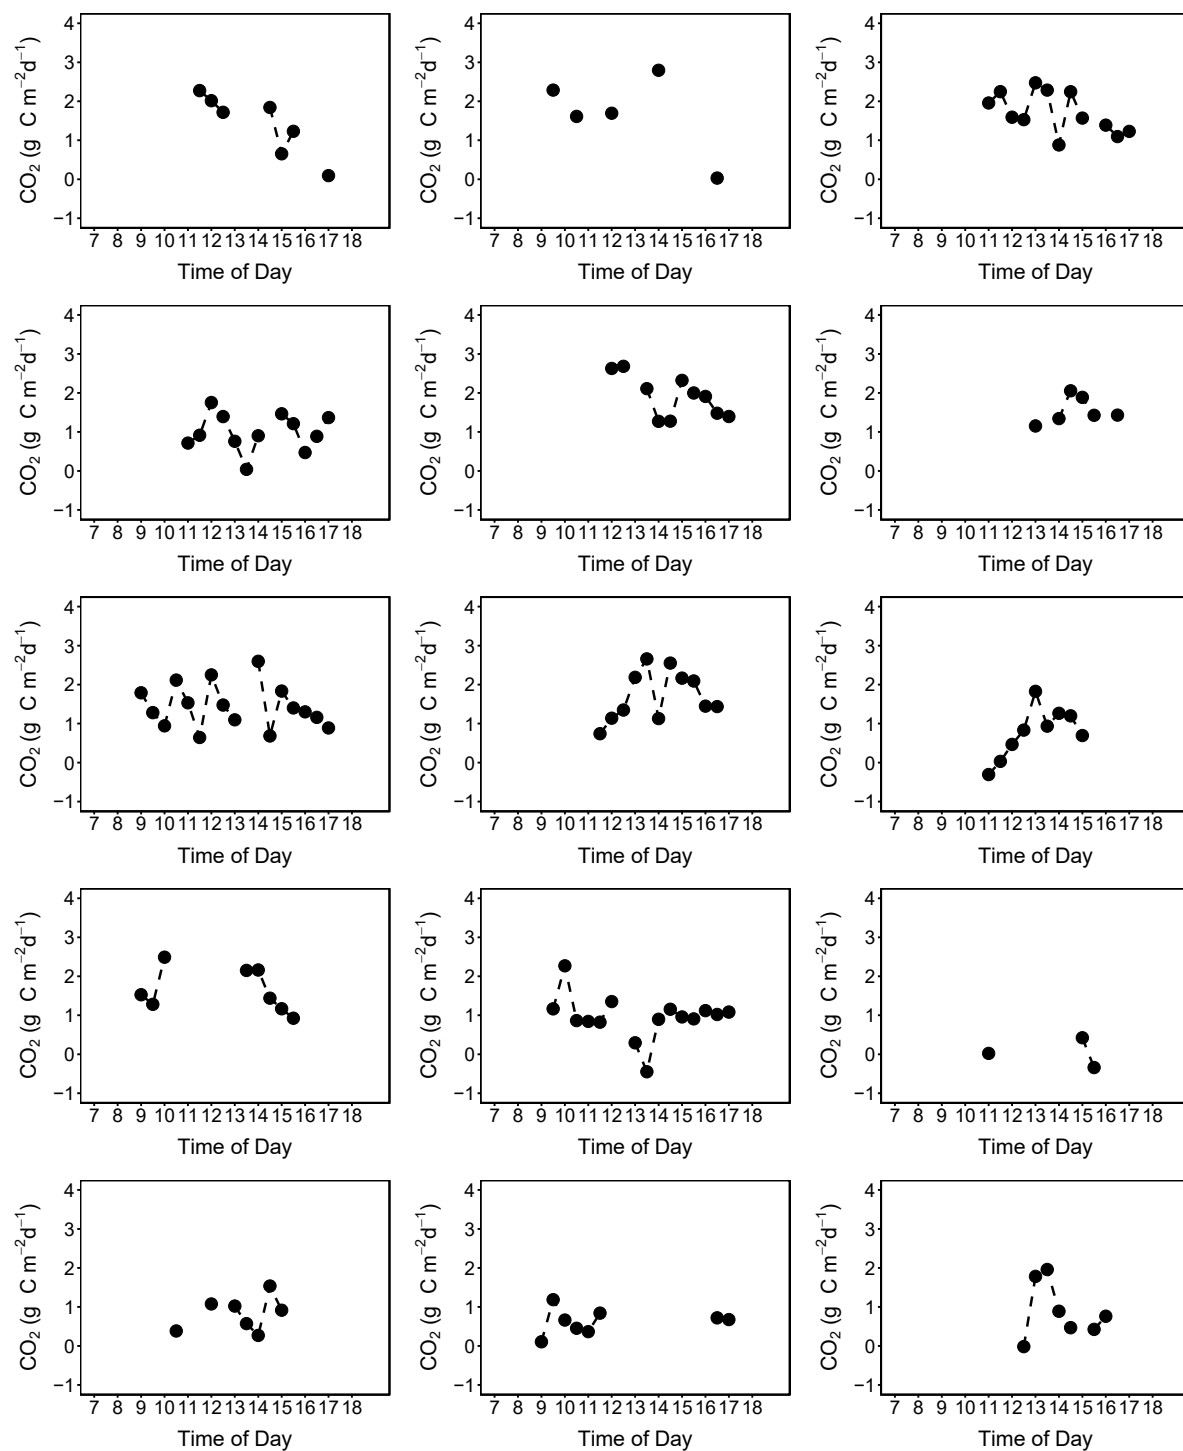

**Figure S6** Plot of CO<sub>2</sub> emissions over the course of 15 days during the period of August 17<sup>th</sup> to September 23<sup>rd</sup>, 2022 at AB. The purple and green boxes indicate periods when harrowing and vacuum harvesting occurred respectively.



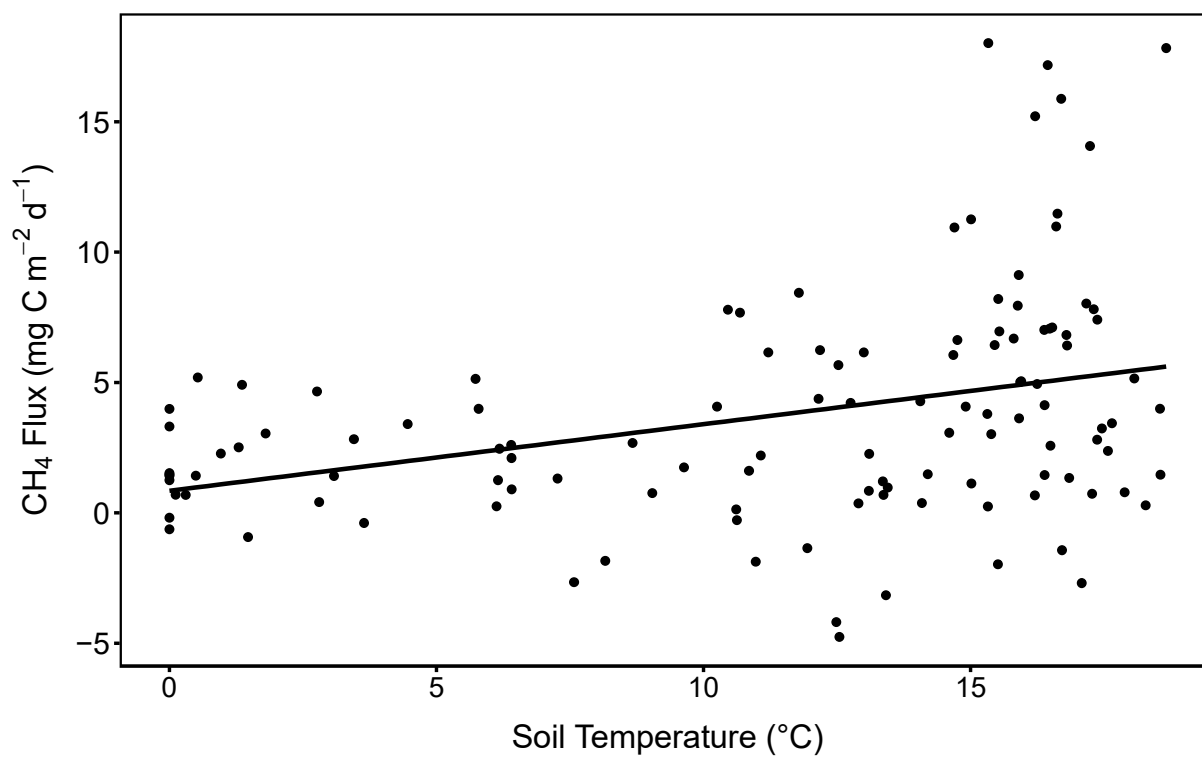

**Figure S7** Scatterplots showing the effect of soil temperature on daily daytime (9 am to 5:30 pm) CH<sub>4</sub> fluxes at AB in 2022. The significant linear regression explained 11% of the variation.

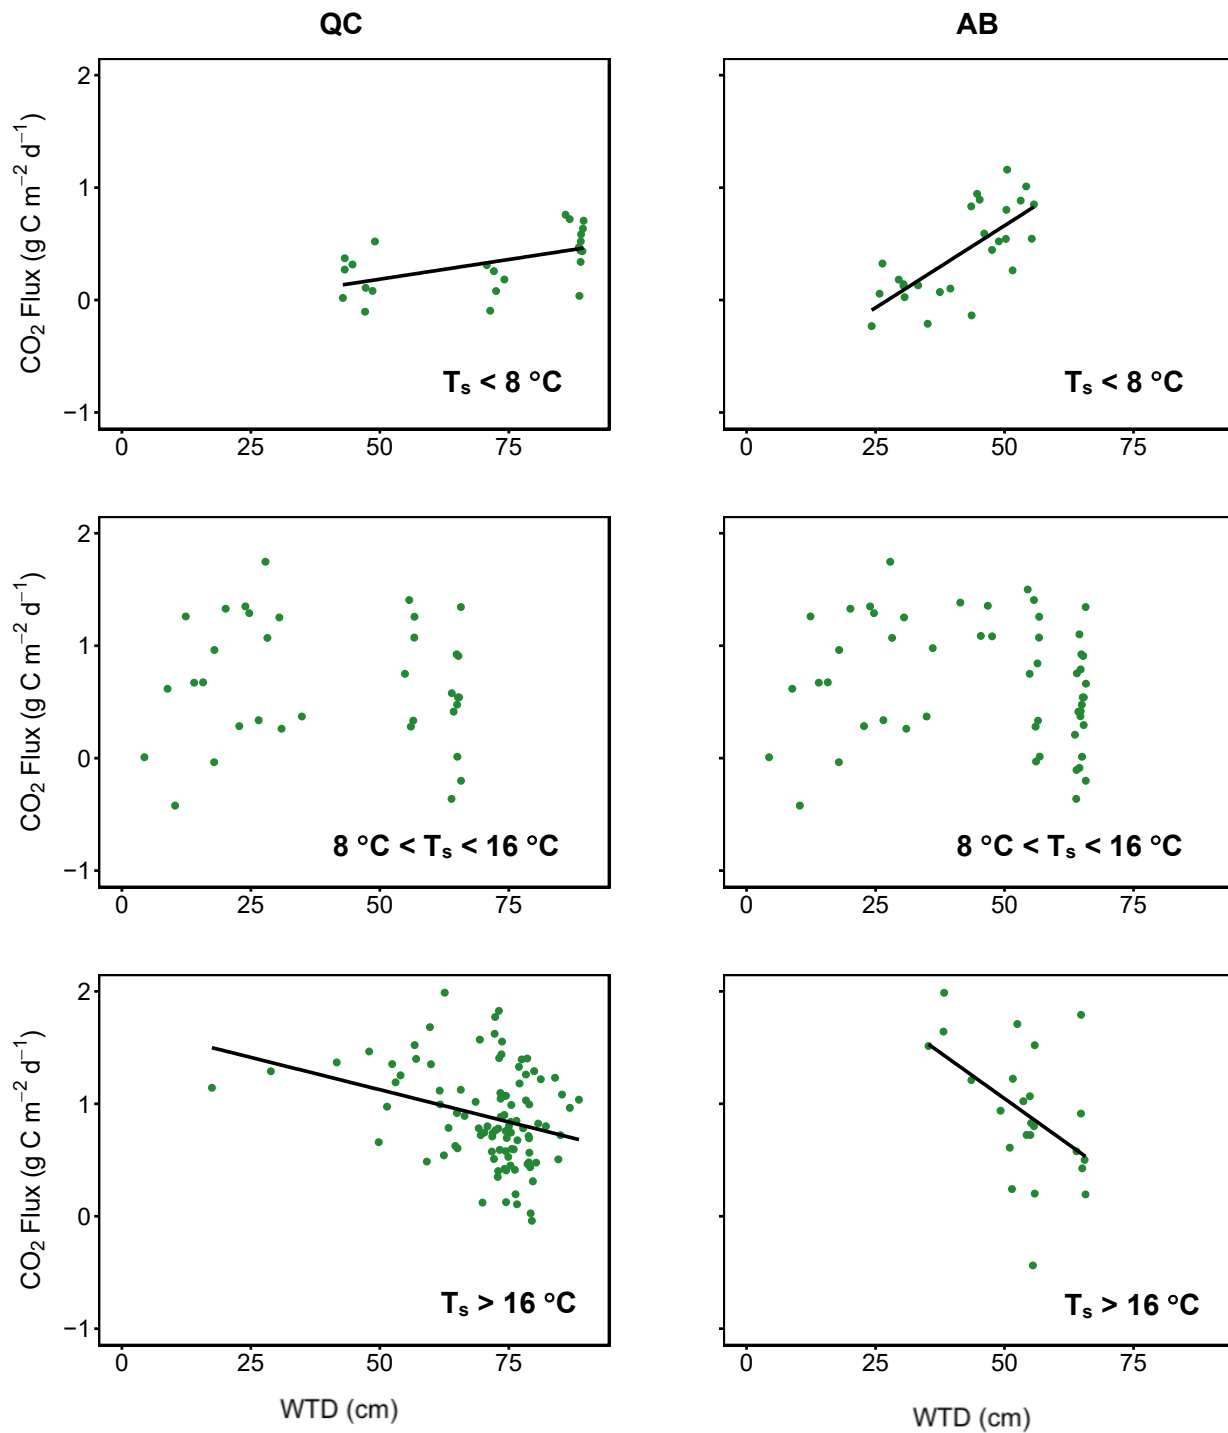

**Figure S8** Scatterplots showing the effect of WTD on daily daytime (9 am to 5:30 pm) CO<sub>2</sub> fluxes at QC (left column) and AB (right column) across the study years. The CO<sub>2</sub> data has been divided by 10 cm depth (QC) and 20 cm depth (AB) soil temperature (T<sub>s</sub>), as cool periods (T<sub>s</sub> < 8 °C), moderate periods (8 °C < T<sub>s</sub> < 16 °C) and warm periods (T<sub>s</sub> > 16 °C). All linear regressions were significant (Table S8).

**Table S1** Total area (m<sup>2</sup>) of the fields and ditches in the 80% and 90% probability flux footprints at AB and QC in the study years.

|                 | AB    |       |       | QC    |       |
|-----------------|-------|-------|-------|-------|-------|
|                 | 2020  | 2021  | 2022  | 2020  | 2022  |
| 80% probability |       |       |       |       |       |
| Ditches         | 232   | 366   | 229   | 564   | 407   |
| Fields          | 6058  | 8897  | 6544  | 18198 | 19720 |
| 90% probability |       |       |       |       |       |
| Ditches         | 972   | 1724  | 844   | 2580  | 2011  |
| Fields          | 23825 | 35250 | 25867 | 74988 | 81528 |

**Table S2** Percent of daytime and nighttime CO<sub>2</sub> fluxes per month in each year at AB. A value of n.m indicates that data was not measured that month. Fluxes were categorized as daytime and nighttime when the incoming solar radiation was greater than 20 W m<sup>-2</sup> and less than 20 W m<sup>-2</sup>, respectively. In cases when the eddy covariance tower was not operating for the full month, only periods when it was operating were used for calculations.

|           | 2020                         |                                | 2021                         |                                | 2022                         |                                |
|-----------|------------------------------|--------------------------------|------------------------------|--------------------------------|------------------------------|--------------------------------|
|           | Percent<br>Daytime<br>Fluxes | Percent<br>Nighttime<br>Fluxes | Percent<br>Daytime<br>Fluxes | Percent<br>Nighttime<br>Fluxes | Percent<br>Daytime<br>Fluxes | Percent<br>Nighttime<br>Fluxes |
| January   | 1.4                          | 2.1                            | 20.5                         | 4.7                            | n.m                          | n.m                            |
| February  | 14.8                         | 2.8                            | 18.5                         | 5.3                            | n.m                          | n.m                            |
| March     | 34.2                         | 8.4                            | 39.1                         | 15.0                           | n.m                          | n.m                            |
| April     | 41.7                         | 10.8                           | 50.8                         | 13.3                           | n.m                          | n.m                            |
| May       | 37.8                         | 10.3                           | 42.9                         | 10.2                           | 46.5                         | 15.0                           |
| June      | 38.8                         | 4.6                            | 50.1                         | 9.1                            | 27.8                         | 6.1                            |
| July      | 33.2                         | 5.5                            | 37.7                         | 8.2                            | 27.7                         | 2.1                            |
| August    | 38.0                         | 8.1                            | 31.0                         | 3.7                            | 34.9                         | 4.6                            |
| September | 43.5                         | 4.4                            | n.m                          | n.m                            | 40.8                         | 6.2                            |
| October   | 30.8                         | 8.2                            | n.m                          | n.m                            | 44.4                         | 7.1                            |
| November  | 13.9                         | 2.8                            | n.m                          | n.m                            | n.m                          | n.m                            |
| December  | 13.4                         | 2.0                            | n.m                          | n.m                            | n.m                          | n.m                            |

**Table S3** Percent of daytime and nighttime CO<sub>2</sub> fluxes per month in each year at QC. A value of n.m indicates that data was not measured that month. Fluxes were categorized as daytime and nighttime when the incoming solar radiation was greater than 20 W m<sup>-2</sup> and less than 20 W m<sup>-2</sup>, respectively. In cases when the eddy covariance tower was not operating for the full month, only periods when it was operating were used for calculations.

|           | 2020                   |                          | 2022                   |                          |
|-----------|------------------------|--------------------------|------------------------|--------------------------|
|           | Percent Daytime Fluxes | Percent Nighttime Fluxes | Percent Daytime Fluxes | Percent Nighttime Fluxes |
| January   | n.m                    | n.m                      | n.m                    | n.m                      |
| February  | n.m                    | n.m                      | n.m                    | n.m                      |
| March     | n.m                    | n.m                      | n.m                    | n.m                      |
| April     | n.m                    | n.m                      | n.m                    | n.m                      |
| May       | n.m                    | n.m                      | 44.7                   | 17.1                     |
| June      | n.m                    | n.m                      | 38.8                   | 13.2                     |
| July      | 45.3                   | 12.8                     | 42.7                   | 21.3                     |
| August    | 36.5                   | 12.8                     | 38.8                   | 15.4                     |
| September | 44.6                   | 17.2                     | 50.5                   | 23.9                     |
| October   | 29.7                   | 13.9                     | 45.8                   | 18.8                     |
| November  | n.m                    | n.m                      | n.m                    | n.m                      |
| December  | n.m                    | n.m                      | n.m                    | n.m                      |

**Table S4** Percent of daytime and nighttime CH<sub>4</sub> fluxes per month in each year at AB. A value of n.m indicates that data was not measured that month. Fluxes were categorized as daytime and nighttime when the incoming solar radiation was greater than 20 W m<sup>-2</sup> and less than 20 W m<sup>-2</sup>, respectively. In cases when the eddy covariance tower was not operating for the full month, only periods when it was operating were used for calculations.

| Alberta   |                           |                             |
|-----------|---------------------------|-----------------------------|
|           | Percent Daytime<br>Fluxes | Percent Nighttime<br>Fluxes |
| January   | n. m                      | n. m                        |
| February  | n. m                      | n. m                        |
| March     | n. m                      | n. m                        |
| April     | n. m                      | n. m                        |
| May       | 19.3                      | 5.3                         |
| June      | 12.1                      | 1.9                         |
| July      | 10.6                      | 0.2                         |
| August    | 12.4                      | 0.3                         |
| September | 0                         | 0                           |
| October   | 0                         | 0                           |
| November  | n. m                      | n. m                        |
| December  | n. m                      | n. m                        |

**Table S5** Monthly 9 am to 5:30 pm local time average and median (in brackets) CO<sub>2</sub> emissions (g C m<sup>-2</sup> d<sup>-1</sup>) at AB and QC in 2020, 2021 and 2022. A value of n.m indicates that data was not measured that month. Letters indicate when fluxes are significantly different, based on a linear model on the effect of the interaction of location and month on CO<sub>2</sub> fluxes.

|           | Quebec Site                    |                                 | Alberta Site                    |                                 |                                 |
|-----------|--------------------------------|---------------------------------|---------------------------------|---------------------------------|---------------------------------|
|           | 2020                           | 2022                            | 2020                            | 2021                            | 2022                            |
| March     | n.m                            | n.m                             | 0.13 <sup>bc</sup><br>(0.17)    | -0.01 <sup>ab</sup><br>(0.01)   | n.m                             |
| April     | n.m                            | n.m                             | 0.45 <sup>efgh</sup><br>(0.43)  | -0.19 <sup>a</sup><br>(-0.19)   | n.m                             |
| May       | n.m                            | 0.91 <sup>klm</sup><br>(0.87)   | 0.34 <sup>cdef</sup><br>(0.42)  | 0.16 <sup>bcd</sup><br>(0.25)   | 0.50 <sup>efghi</sup><br>(0.45) |
| June      | n.m                            | 1.09 <sup>m</sup><br>(1.18)     | 0.40 <sup>cdefg</sup><br>(0.45) | 0.22 <sup>bcde</sup><br>(0.20)  | 0.68 <sup>ghijk</sup><br>(0.66) |
| July      | 0.74 <sup>ijkl</sup><br>(0.75) | 1.02 <sup>lm</sup><br>(1.07)    | 0.71 <sup>hijk</sup><br>(0.68)  | 0.76 <sup>ijkl</sup><br>(0.78)  | 1.00 <sup>lm</sup><br>(1.01)    |
| August    | 0.39 <sup>cdef</sup><br>(0.37) | 0.84 <sup>ijklm</sup><br>(0.81) | 0.74 <sup>ijkl</sup><br>(0.79)  | 0.43 <sup>defgh</sup><br>(0.37) | 1.00 <sup>lm</sup><br>(1.07)    |
| September | 0.55 <sup>fghi</sup><br>(0.54) | 0.56 <sup>fghij</sup><br>(0.56) | 0.54 <sup>fghi</sup><br>(0.49)  | n.m                             | 0.84 <sup>ijklm</sup><br>(0.90) |
| October   | 0.31 <sup>cdef</sup><br>(0.21) | 0.53 <sup>fghi</sup><br>(0.55)  | 0.34 <sup>cdef</sup><br>(0.37)  | n.m                             | 0.52 <sup>fghi</sup><br>(0.59)  |

**Table S6** Monthly 9 am to 5:30 pm local time average and median (in brackets) CH<sub>4</sub> emissions (mg C m<sup>-2</sup> d<sup>-1</sup>) at AB 2022. Letters indicate when fluxes are significantly different, based on a linear model on the effect month on CH<sub>4</sub> fluxes.

| Month  | CH <sub>4</sub> Flux      |
|--------|---------------------------|
| May    | 6.54 <sup>a</sup> (7.17)  |
| June   | 5.48 <sup>a</sup> (5.89)  |
| July   | 7.73 <sup>ab</sup> (7.63) |
| August | 9.13 <sup>b</sup> (9.35)  |

**Table S7** Outputs of linear model on the effect of soil temperature at 20 cm depth (at AB) and 10 cm depth (at QC) on daily CO<sub>2</sub> emissions across the study years. The CO<sub>2</sub> data has been divided in wet periods (WTD < 25 cm), moderate periods (50 cm > WTD > 25 cm), dry periods (75 cm > WTD > 50 cm) and very dry periods (WTD > 75 cm).

|         | Depth    | DF    | F     | P       | R <sup>2</sup> |
|---------|----------|-------|-------|---------|----------------|
| AB site |          |       |       |         |                |
|         | Wet      | 1, 11 | 2.62  | 0.13    | 0.12           |
|         | Moderate | 1, 31 | 47.13 | <0.0001 | 0.59           |
|         | Dry      | 1, 56 | 0.17  | 0.68    | -0.02          |
| QC site |          |       |       |         |                |
|         | Moderate | 1, 18 | 42.68 | <0.0001 | 0.69           |
|         | Dry      | 1, 92 | 24.34 | <0.0001 | 0.20           |
|         | Very Dry | 1, 97 | 9.95  | 0.0021  | 0.08           |



**Table S8** Outputs of linear model on the effect of WTD on daily CO<sub>2</sub> emissions across the study years. The CO<sub>2</sub> data has been divided by 10 cm depth (QC) and 20 cm depth (AB) soil temperature (T<sub>s</sub>), as cool periods (T<sub>s</sub> < 8 °C), moderate periods (8 °C < T<sub>s</sub> < 16 °C) and warm periods (T<sub>s</sub> > 16 °C). See Figure S8.

|         | Soil Temperature | DF    | F     | P       | R <sup>2</sup> |
|---------|------------------|-------|-------|---------|----------------|
| AB site |                  |       |       |         |                |
|         | Cool             | 1, 24 | 27.01 | <0.0001 | 0.51           |
|         | Moderate         | 1, 54 | 0.95  | 0.34    | 0.001          |
|         | Warm             | 1, 23 | 5.34  | 0.03    | 0.15           |
| QC site |                  |       |       |         |                |
|         | Cool             | 1, 22 | 8.51  | 0.0079  | 0.25           |
|         | Moderate         | 1, 86 | 0.05  | 0.82    | 0.01           |
|         | Warm             | 1, 98 | 10.12 | 0.0019  | 0.08           |
